# Supplementary material for: Proton pump inhibitors protect mice from acute systemic inflammation and induce long-term cross-tolerance
Source: PubMed Central journal article supplement (PMC4973356; doi:10.1038/cddis.2016.218), 2016-07-21
Supplement: cddis2016218x1.pdf [file cddis2016218x1.pdf]

## Supplementary Information

### PROTON-PUMP INHIBITORS PROTECT MICE FROM ACUTE SYSTEMIC INFLAMMATION AND INDUCE LONG TERM CROSS-TOLERANCE (*Balza et al.*)

**Supplementary Table S1. Primers and conditions for Real Time PCR**

| Gene (ID)                                | Primer sequence                | Primer concentrations ( $\mu\text{M/L}$ ) | Amplicon size (bp) | Ta ( $^{\circ}\text{C}$ ) |
|------------------------------------------|--------------------------------|-------------------------------------------|--------------------|---------------------------|
| h- <i>IL-1<math>\beta</math></i> (3553)  | F 5' TCCAGGGACAGGATATGGAG 3'   | 0,25                                      | 133                | 60                        |
|                                          | R 5' TCTTCAACACGCAGGACAG 3'    | 0,25                                      |                    |                           |
| h- <i>TNF-<math>\alpha</math></i> (7124) | F 5' CAGGGACCTCTCTAAT 3'       | 0,25                                      | 98                 | 58                        |
|                                          | R 5' GAGGGTTTGCTACAACAT 3'     | 0,25                                      |                    |                           |
| h- <i>GAPDH</i> (2597)                   | F 5' GAAGGTGAAGGTCGGAGTC 3'    | 0,2                                       | 155                | 60                        |
|                                          | R 5' CATGGGTGGAATCATATTGGAA 3' | 0,2                                       |                    |                           |
| m- <i>P2rx7</i> (18439)                  | F 5' TCCACCCTGTCCTACTTTGG 3'   | 0,25                                      | 116                | 60                        |
|                                          | R 5' CAGGGCTCACAGCACTTACA 3'   | 0,25                                      |                    |                           |
| m- <i>ATP4b</i> (11945)                  | F 5' GGTAACCTTGAGACCGGACG 3'   | 0,2                                       | 149                | 60                        |
|                                          | R 5' AGTTGATGCTGTCCTGCTGG 3'   | 0,2                                       |                    |                           |
| m- <i>GAPDH</i> (14433)                  | F 5' ATGGCCTCCGTGTTCTAC 3'     | 0,2                                       | 100                | 60                        |
|                                          | R 5' GCTTCACCACCTTCTTGATGTC 3' | 0,2                                       |                    |                           |

Gene ID from [www.ncbi.nlm.nih.gov/gene](http://www.ncbi.nlm.nih.gov/gene); : h : human; m: mouse; F: forward; R: reverse; Ta: annealing temperature; *IL-1 $\beta$* : Interleukin 1 beta; *TNF- $\alpha$*  : Tumor Necrosis Factor; *GAPDH*: Glyceraldehyde-3-Phosphate Dehydrogenase; *P2rx7*: purinergic receptor P2X, ligand-gated ion channel, 7; *ATP4b* : ATPase, H<sup>+</sup>/K<sup>+</sup> exchanging, beta polypeptide.
